# Supplementary material for: Community overview on the differential prevalence of Hepatitis E in two Sub Counties in Kitgum District: A qualitative study
Source: Research Square preprint supplement (doi:10.21203/rs.3.rs-1197002/v1), 2021-12-29
Supplement: Supplementary file 1 [file f7276f88aef6afe630334527.docx]

**Supplementary file A1and A2**

**Supplementary file A1: Key informant interview guide**

1. What common health problems are affecting communities in the Sub Counties of Mucwini and Kitgum Matidi?
2. Could you comment on the general sanitation in the homesteads in the two communities of Mucwini and Kitgum Matidi
3. What is the latrine coverage in the two communities of Mucwini and Kitgum Matidi?
4. Are people aware of Hepatitis E? if so, what is the level of awareness? If not, why is that so?
5. What challenges do you face in controlling Hepatitis E in your community?
6. What can we do to control Hepatitis E in Kitgum District?

**Supplementary file A2: Focus Group Discussion Guide**

1. Have you heard about Hepatitis E? How big is that problem in your community?
2. What is Hepatitis E? what is associated with this disease in your community?
3. How would you feel, and what would you do if someone in your home contracted the hepatitis E virus?
4. What is being done in this community to ensure that Hepatitis E is controlled?
5. What do you think is not being done to control Hepatitis E and should be improved?
